# Supplementary material for: Standardization of DNA amount for bisulfite conversion for analyzing the methylation status of LINE-1 in lung cancer
Source: PLoS One. 2021 Aug 17;16(8):e0256254. doi: 10.1371/journal.pone.0256254 (PMC8370637; doi:10.1371/journal.pone.0256254)
Supplement: S1 Table — (XLSX) [file pone.0256254.s001.xlsx]

## Sheet: Lung cancer sample
S1 Table. Quantification of DNA extracted from lung cancer and non-cancerous FFPE samples
Number	SampleID	LabID	Concentration (ng/µl)	A260/A280	A260/A230	Number	SampleID	LabID	Concentration (ng/µl)	A260/A280	A260/A230
1	PT14/744C(2)	KP1	950	1.88	2.38	86	PT14/158A(3)	KP86	25	1.94	2.09
2	PT15/633B(1)	KP2	76.2	1.95	3.9	87	PT15/181A(1)	KP87	3.6	1.99	1.58
3	PT15/126A(1)	KP3	89	1.92	2.45	88	PT12/800B(2)	KP88	14.3667	1.93	2.11333
4	PT13/1345A(1)	KP4	155	1.81	1.93	89	PT15/1294A(3)	KP89	130.133	1.88667	2.32667
5	PT15/418A(2)	KP5	167	1.83	1.9	90	PT15/1519A(7)	KP90	142.367	1.89667	2.31
6	PT15498a(1)	KP6	126	1.81	1.9	91	PT15/1540(1)	KP91	10.8	1.97	1.71667
7	PT14/211A(3)	KP7	361.5	1.87	2.25	92	PT15/1661(1)	KP92	5	2.01	1.2
8	PT15/056A(1)	KP8	16	1.99	0.36	93	PT14/585C(2)	KP93	115	1.9	1.94
9	PT14/568A(3)	KP9	42.6	1.9	3.7	94	PT15/597B(2)	KP94	1.6	2	1.23
10	PT15/751(1)	KP10	33	1.97	0.39	95	PT14/1179(1)	KP95	15.6	1.98	3.04
11	PT15/1282A(3)	KP11	860	1.89	2.35	96	PT14/502C(3)	KP96	215.5	1.91	1.15
12	PT14/1277A(3)	KP12	143.5	1.9	2.4	97	PT14/641A(2)	KP97	34.8	2.1	0.32
13	PT13/122D(5)	KP13	16.7	1.72	0.6	98	PT15/405B	KP98	14.9	1.8	1.9
14	PT15/690A(1)	KP14	223	1.81	1.63	99	PT14/967	KP99	26.4	1.81	1.9
15	PT15/982(1)	KP15	2	2.05	0.25	100	PT12/1258B(2)	KP101	26.5333	1.78333	1.95667
16	PT15/1630A(2)	KP16	620	1.9	2.2	101	PT14/92A(1)	KP102	107.933	1.86	2.19667
17	PT14/11(1)	KP17	70.5	1.82	1.65	102	PT1431(1)	KP103	14.3333	1.95667	2.00333
18	PT13/357B(1)	KP18	70	1.86	0.33	103	PT13/1093A(1)	KP104	90.8333	1.83333	2.23667
19	PT15/608A	KP19	314.1	1.86	2.01	104	PT14/1024(1)	KP105	75.7	1.86	2.40333
20	PT09/147B	KP20	276.7	1.78	1.9	105	PT14/10B1	KP106	77.2	1.89333	2.40333
21	PT13/48A(1)	KP21	62.7333	1.82	1.07667	106	PT14/344B1	KP107	2.63333	1.87	0.493333
22	PT14/794A(1)	KP22	62.1333	1.79667	1.77667	107	PT14/4751	KP108	11.2333	1.81	0.493333
23	PT15/729(2)	KP23	12	1.74667	1.01333	108	PT14/583(1)	KP109	5.83333	2.01	0.6
24	PT14/129B(2)	KP24	78.7667	1.86667	2.15667	109	PT14/717B	KP110	4.4	2.04	3.40667
25	PT15/122L(4)	KP25	56	1.85	2.02	110	PT15/922	KP111	73.6667	1.84333	2.26
26	PT14/274B(1)	KP26	98.4667	1.88	2.03	111	PT13/621A1	KP112	102.533	1.85667	1.78667
27	PT13/178A(2)	KP27	41.7	1.72667	0.816667	112	PT14/830(1)	KP113	107.5	1.85333	2.05667
28	PT15/1653A(2)	KP28	85.5333	1.9	0.476667	113	PT14/867A	KP114	103.367	1.87	1.64667
29	PT15/628A(1)	KP29	198.867	1.85333	2.22667	114	PT14/1041A(1)	KP115	154.167	1.82333	2.07333
30	PT15/1561(2)	KP30	16.9333	2.02667	2.43333	115	PT14/1183A	KP116	347.4	1.89333	2.22
31	PT15/740A(1)	KP31	191.033	1.88333	2.3	116	PT15/1485B	KP118	133	2	2.6
32	PT14/1005B	KP32	248.567	1.87	2.31	117	PT14/540B	KP119	23.425	2.04	2.9075
33	PT15/1022A(1)	KP33	46.2	2	0.59	118	PT14/1415A	KP120	23	2.05	0.786667
34	PT15/03A(2)	KP34	27.7667	1.89	0.323333	119	PT14/1552	KP121	361.433	1.91	2.24
35	PT13/333A(3)	KP35	10.9	1.75	0.8	120	N36192	KP122	22.9	1.86	2.34
36	PT15/022(2)	KP36	6.33333	1.78	0.546667	121	N36295	KP123	306.1	1.85	2.39
37	PT13/1029A(2)	KP37	20.0333	1.76667	1.33333	122	N36153	KP124	47.5	1.85	1.99
38	PT15/786C(1)	KP38	33.6667	1.71667	0.793333	123	N36377	KP125	28.8	1.82	2.62
39	PT15/1179(1)	KP39	36.4667	1.85	0.163333	124	N36407	KP126	11.6	1.77	3.25
40	PT15/844D(3)	KP40	23.1	1.76667	1.05333	125	N36191	KP127	53.3	1.92	1.98
41	PT14/326B(3)	KP41	126	1.88	2.34	126	N36484	KP128	13.1	1.73	6.86
42	PT14/516A(1)	KP42	58.0333	1.75333	1.94333	127	N36520	KP129	23.6	2.12	2.36
43	PT11/1025B(3)	KP43	142.6	1.74	1.18	128	N36555	KP130	52.1	1.82	2.39
44	PT14/1206A(1)	KP44	214.267	1.87667	2.27333	129	N36765	KP131	116.3	1.83	2.13
45	PT14/502B(3)	KP45	155.767	1.88333	2.15	130	N35836	KP132	35	1.72	0.77
46	PT15/077C(3)	KP46	158.133	1.87	2.34667	131	N37179	KP133	4.6	1.73	2.3
47	PT14/243A(1)	KP47	115.467	1.70667	1.26	132	N36927	KP134	125	1.85	2.45
48	PT15/1304(2)	KP48	111.133	1.83	0.16	133	ST19/1507	KP135	72	1.85	2.37
49	PT15/1599AM	KP49	573.8	1.89	2	134	ST19/1385	KP136	12.8	1.81	2.2
50	PT15/1439(2)M	KP50	7.2	1.73	1.5	135	ST19/1921	KP137	19.2	1.96	2.48
51	PT15/091	KP51	92	1.9	1.93	136	37444	KP138	30.2	1.92	2.6
52	PT14/211B	KP52	457.2	1.86	2.11	137	37556	KP139	9.7	2.16	6.58
53	PT14/1077	KP53	225	1.88	1.83	138	19/2491	KP140	18.5	1.94	1.02
54	PT13/1458B(1)	KP54	108	1.83	2.14	139	TN18/1482	KP141	7.5	2.02	0.82
55	PT15/786D(1)	KP55	43	1.8	1.81	140	ST19/1729	KP142	24.8	1.71	0.48
56	PT13/249C(4)	KP56	95.7	1.79	1.8	141	N37790	KP143	19.6	1.79	1.55
57	PT15/690B(3)	KP57	94.3	1.95	1.7	142	ST19/2334	KP144	55.9	1.85	2.25
58	PT15/129B(2)	KP58	466	1.92	2.21	143	N37942	KP145	7	1.98	1.87
59	PT14/795A(3)	KP59	144	1.89	2.17	144	N38274	KP146	15.2	1.71	0.66
60	PT14/1049A(3)	KP60	352	1.89	2.21	145	ST18/0618	KP147	9.6	1.76	0.19
61	PT12/1242B(2)	KP61	56	1.83	1.85	146	N38885	KP148	15	1.71	2.64
62	PT14/1301A(1)	KP62	466	1.91	2.17	147	N38670	KP149	445.9	1.83	2.37
63	PT14/1433A(1)	KP63	110	1.88	2.16	148	N38372	KP150	59.5	1.74	2.47
64	PT09/735A(3)	KP64	105.6	1.81333	2.04	149	N39080	KP151	87.6	1.77	1.01
65	pT14/01B(3)	KP65	116.033	1.78	2.11	150	N39144	KP152	80.5	1.77	2.29
66	pT13/1012A(2)	KP66	54.7	1.8	1.88	151	N35282	KP153	95	1.71	1.85
67	PT15/1344(2)	KP67	300.2	1.87667	2.28333	152	PT18/2342A	KP154	211.5	1.77	1.96
68	pT15/963A(1)	KP68	302.1	1.88333	2.30333	153	PT19/381A	KP155	2.4	1.92	0.9
69	pT14/3173(1)	KP69	239.967	1.86333	2.19667	154	N40832	KP156	1.6	1.88	0.65
70	PT/735A(3)	KP70	202.367	1.83667	2.25333	155	N32930	KP157	25.6	1.93	1.5
71	PT15/659(1)	KP71	2.7	1.83667	0.466667	156	ST18/3381	KP158	10.9	1.94	-1.06
72	PT15/139(2)	KP72	311.433	1.88333	2.29667	157	N40988	KP159	62	1.73	1.3
73	PT14/785C(1)	KP73	137.533	1.81	2.12333	158	PT18/2615	KP160	70.1	1.8	2.23
74	PT12/928A(2)	KP74	98.2333	1.81	1.76	159	ST19/06737	KP161	22.8	1.87	1.78
75	PT15/320A(1)	KP75	35.8333	1.81	1.76	160	N41229	KP162	83.5	1.71	1.52
76	PT14/627(1)(1)	KP76	2.33333	2.11	0.146667	161	ST19/7412	KP163	344.2	1.77	2.1
77	PT14/897(3)	KP77	32.0667	1.91333	1.93	162	ST19/7618	KP164	5	1.82	0.27
78	PT15/1043A(5)	KP78	41	1.93333	1.93333	163	N41917	KP165	30	1.96	0.95
79	PT14/1597A(1)	KP79	2.23333	2.02	0.366667	164	N41891	KP166	55	1.73	1.19
80	PT15/1616C	KP80	57.0333	1.95	2.28667	165	B4678(12)	KP167	90	1.81	1.4
81	pT12/549A(3)	KP81	50.0333	1.92667	2.11667	166	N41758	KP168	372	1.8	1.95
82	pT13/1489A	KP82	11	2.09667	1.6	167	ST19/8236	KP169	296	1.85	2.37
83	pT14/1616A(2)	KP83	52.5	1.92	1.53667	168	N42616	KP170	7	2.05	3.33
84	pT15/331B(2)	KP84	2.7	1.84	0.353333	169	N37980	KP171	1053.3	1.8	2.24
85	pT168B/08(1)	KP85	33.8	1.91	1.25667	170	N42723	KP172	20.2	2.21	1.87
						171	N43052	KP173	2.7	1.7	3.1

## Sheet: Non-cancerous sample
S1 Table. Quantification of DNA extracted from lung cancer and non-cancerous FFPE samples
Number	SampleID	LabID	Concentration (ng/µl)	A260/A280	A260/A230	Number	SampleID	LabID	Concentration (ng/µl)	A260/A280	A260/A230
1	N36407	CP1	6.2	1.87	11.22	53	PT14/1271A	CP77	15.3333	1.94667	0.773333
2	PT14/1575B	CP2	19.5	1.95	0.64	54	PT14/1312	CP78	1.33333	2	0.306667
3	N36520	CP3	8.7	1.83	0.55	55	PT14/1345A	CP79	2.925	1.8	0.435
4	PT14/1574A	CP4	19.9	1.88	0.81	56	PT14/1449A	CP80	3.96667	1.8	0.333333
5	N35555	CP5	68.8	1.91	1.16	57	PT14/1389A	CP81	16	1.90667	1.72667
6	N35836	CP6	9.4	1.82	2.1	58	PT14/1503A	CP83	12.0333	1.96333	1.52333
7	ST19/1507	CP7	17.6	1.95	2.74	59	PT14/1543	CP84	2.36667	1.8	0.23
8	ST19/1385	CP8	17.6	1.95	2.74	60	PT14/1554B	CP85	15.6333	1.96333	1.72667
9	N37942	CP9	5	2.38	3.35	61	PT14/1296A	CP87	6.8	1.8	0.79
10	N38274	CP10	12.2	1.73	0.59	62	PT14/1329	CP88	3.86667	1.8	0.49
11	N43052	CP11	2.1	1.85	3.98	63	PT14/1348A	CP89	17.6	1.99	1.71333
12	N37980	CP12	1053.3	1.8	2.24	64	PT14/1425	CP91	7.96667	2	0.933333
13	N42723	CP13	20.2	2.21	1.87	65	PT14/1460A	CP92	19.7333	2.01	2.07
14	N43052	CP14	2.7	1.7	3.1	66	PT14/1424A	CP93	23	1.95	1.9
15	N42916	CP15	260	1.81	2.4	67	PT14/1570A	CP96	12.4333	1.90667	1.46667
16	PT14/1545B	CP16	6.9	1.74	0.43	68	N36192	CP97	28.6	1.61	0.75
17	PT14/1556A	CP17	20.1667	1.83667	1.94667	69	N36295	CP98	123.7	1.86	2.42
18	N43605	CP18	51	1.7	0.9	70	N36153	CP99	16.7	1.76	2.35
19	N43828	CP19	52	1.7	2.3	71	N36377	CP100	44.6	2.45	0.81
20	PT14/1322	CP20	11.2	1.9	0.2	72	PT14/1306	CP101	21.3667	1.90667	1.46
21	PT14/1450B	CP21	4.9	1.94	0.79	73	N36191	CP102	158.8	1.82	2
22	PT14/1533	CP22	27	1.87	1.44	74	N36484	CP103	78.5	1.81	2
23	N43090	CP23	13.9	1.9	2.88	75	PT14/1444	CP104	1.46667	1.8	0.5
24	N43870	CP24	5.9	2.64	19.67	76	PT14/1445	CP105	12.4	2.03333	1.98667
25	PT14/1349	CP30	67.4	1.7	0.57	77	N36765	CP106	60.7	1.86	2.39
26	PT14/1509A	CP31	27.5	1.84	1.49	78	PT14/1287	CP107	15.7333	1.89667	1.24667
27	PT14/1550A	CP32	7.8	1.74	0.88	79	N37179	CP108	3.3	1.89	1.06
28	PT14/1324A	CP35	64.8	1.86	0.82	80	PT14/1448	CP109	10.0667	2.01667	2.31
29	PT14/1328A	CP36	27.9	1.72	0.73	81	PT14/1558A	CP110	10.2333	2.1	1.86667
30	PT14/1447A	CP38	119.2	1.64	1.32	82	PT14/1606A	CP111	7.4	1.94	1.72
31	PT14/1517A	CP39	5	1.67	0.83	83	PT14/1621	CP112	6.06667	2	2.42
32	PT14/1254A	CP40	11.4	1.89	0.42	84	PT14/1310	CP113	50.9333	1.85333	1.62667
33	PT14/1362B	CP41	38.8	1.86	1.66	85	N43510	CP114	98.2	1.79	2.4
34	PT14/1465	CP42	15.8	1.74	1.02	86	PT14/1429A	CP115	1.1	2	0.11
35	PT14/1542	CP43	7.2	1.9	0.14	87	PT14/1562B	CP116	12.2667	1.90667	0.986667
36	PT14/1607A	CP44	5.8	1.8	0.25	88	PT14/1576	CP117	8.26667	1.92667	1.12333
37	PT14/1265B	CP45	22	1.8	1.22	89	PT14/1612B	CP118	22	1.93333	3
38	PT14/1541A	CP47	18.9	1.70667	0.683333	90	PT14/1256A	CP119	24.3333	1.90667	1.60667
39	PT14/1600A	CP48	26.1667	1.8	0.16	91	PT14/1403A	CP121	8.5	1.84	0.466667
40	PT14/1611A	CP49	9	1.8	0.15	92	PT14/1468A	CP122	10.25	1.6925	0.765
41	PT14/1309	CP50	9.7	1.83	2.31	93	PT14/1336	CP123	38.3333	1.80333	1.96
42	PT14/1515	CP51	9.83333	1.85	0.783333	94	PT14/1559A	CP127	15.8667	1.6	1.10667
43	PT14/1536A	CP52	73.1333	1.69333	0.946667	95	PT14/1442	CP131	24.8667	1.9	0.843333
44	PT14/1261A	CP56	59	1.74333	1.66667	96	PT14/1567	CP132	8.36667	1.83333	2.01333
45	PT14/1353A	CP58	71.1667	1.70333	1.25667	97	PT14/1405A	CP136	14.1667	1.79667	1.61
46	PT14/1354	CP59	46.5	1.76333	1.85	98	PT14/1516A	CP138	6.3	1.61333	1.57
47	PT14/1529A	CP66	11.8333	2.02333	1.58667	99	PT14/1432	CP141	9.26667	1.9	8.38
48	PT14/1599B	CP67	13.1667	2.02333	1.48333	100	PT14/1459B	CP143	18.3667	1.8	4.26333
49	PT14/1340A	CP68	27.5	1.76667	1.71667	101	PT14/1551A	CP144	12.7333	1.9	0.596667
50	PT14/1414	CP69	5	1.71	1.14	102	PT14/1244A	CP145	420.833	1.88333	2.23333
51	PT14/1235A	CP75	13.4667	1.90667	0.97	103	PT14/1566A	CP148	4.6	1.7	0.503333
52	PT14/1255A	CP76	10.4333	1.78333	0.86	104	PT14/1555A	CP156	8.75	1.8	2.4
